# Supplementary material
Source: publisher site journal article supplement (https://www.dovepress.com/article/326559)
Supplement: Supplementary file 1 [file get_supplementary_file.php]

**Supplementary table 1 The clinical characteristics of bladder cancer patients**

| **Characteristic** | **Number** | **Percentage (%)** |
| --- | --- | --- |
| **Gender** |  |  |
| Male | 27 | 62.8 |
| Female | 16 | 37.2 |
| **Age** |  |  |
| ≦65 years | 18 | 41.9 |
| >65 years | 25 | 58.1 |
| **TNM Stage** |  |  |
| Stage I+II | 17 | 39.5 |
| Stage III+IV | 26 | 60.5 |
| **Grade** |  |  |
| Grade I+II | 19 | 44.2 |
| Grade III+IV | 24 | 55.8 |
| **Total** | 43 | 100.0 |
